# Supplementary material for: A highly stable porous multifunctional Co(ii) metal–organic framework showing excellent gas storage applications and interesting magnetic properties
Source: Royal Society of Chemistry journal article supplement (doi:10.1039/c5ce01123j), 2015-01-01
Supplement: c5ce01123j1.pdf [file c5ce01123j1.pdf]

## Supplementary Materials

### A Highly Stable Porous Multifunctional Co(II) Metal-Organic Framework Showing Excellent Gas Storage Applications and Interesting Magnetic Properties

Jian-Ping Li,<sup>a</sup> Yu-Qin Ma,<sup>\*a</sup> Li-Hua Geng,<sup>\*a</sup> Yun-Hui Li<sup>a</sup> and Fei-Yan Yi,<sup>\*b</sup>

<sup>a</sup> School of Chemistry & Environmental Engineering, Changchun University of Science & Technology, Changchun 130022, China.

<sup>b</sup> State Key Laboratory of Rare Earth Resource Utilization, Changchun Institute of Applied Chemistry, Chinese Academy of Sciences, 5625 Renmin Street, Changchun, Jilin 130022, China.

E-mail: [fyi@ciac.ac.cn](mailto:fyi@ciac.ac.cn); Tel: +86-431-85262407; Fax: +86-431-85698041

#### Experimental Section

**Materials and Synthesis.** All chemicals were purchased commercially and used without further purification. **H<sub>6</sub>L** was synthesized by a modified procedure previously documented.<sup>1</sup>

Elemental analyses of C, H and N in the solid samples were performed with a VarioEL analyzer. Energy Disperse Thermogravimetric and differential thermal analysis (TG-DTA) data were recorded on a Thermal Analysis Instrument (SDT 2960, TA Instruments, New Castle, DE) from room temperature to 700 °C with a heating rate of 10 °C/ min under air atmosphere. Powder X-ray diffraction (XRD) patterns were performed on a D8 Focus (Bruker) diffractometer and D8 advance X-ray powder diffractometer with Cu K $\alpha$  radiation Field-emission ( $\lambda = 0.15405$  nm, continuous, 40 kV, 40 mA, increment = 0.02°). FT-IR spectra were recorded in the range of 4000-650 cm<sup>-1</sup> on a Nicolet 7600 FT-IR spectrophotometer (diamond). Magnetic susceptibility measurements were carried out on a Quantum Design MPMSXL SQUID magnetometer and PPMS-9T system. The raw data were corrected for the susceptibility of the container and the diamagnetic contributions of the sample using Pascal constants. The gas adsorption isotherms for N<sub>2</sub> at 77 K, H<sub>2</sub> at 77 K, CO<sub>2</sub> at 273 K and 298 K were performed on ASAP 2050 V1.01 E and Autosorb MP-1 apparatuses at 1 atm.

Prior to the measurement of gas adsorption, some preparatory work has been done. The

as-synthesized sample of  $\text{Co}_3(\text{L})(\text{dib})\cdot 2\text{H}_2\text{O}\cdot 6\text{DMF}$  (**1**) was immersed into anhydrous methanol for 3 days, methanol was refreshed three times during the exchange. Then similar immersion was utilized to treat the sample with dichloromethane to remove methanol molecules. After the removal of dichloromethane by centrifuging, the wet sample was dried under vacuum at 130 °C for 8 h to yield an activated **1** (denoted as **1a**).

**Synthesis of  $\text{Co}_3(\text{L})(\text{dib})\cdot 2\text{H}_2\text{O}\cdot 6\text{DMF}$  (**1**):**  $\text{Co}(\text{NO}_3)_2\cdot 6\text{H}_2\text{O}$  (0.12 mmol, 35.0 mg),  $\text{H}_6\text{L}$  (0.04 mmol, 39.0 mg), dib (0.08 mmol, 16.8 mg) in mixed  $\text{N,N}'$ -Dimethylformamide (DMF, 6 mL)/distilled water ( $\text{H}_2\text{O}$ , 1 mL) solvent were placed in a 20 ml vial, and then sealed. The sample was heated at 130 °C for three days; cooled to room-temperature slowly. After washed by distilled water, red brick crystals were obtained, yield 52.7 mg (72% based on Co). Its purity was confirmed by X-ray power diffraction (XRD). Anal. Calcd (%) for **1**  $\text{C}_{82}\text{H}_{96}\text{Co}_3\text{N}_{10}\text{O}_{27}$  ( $M_r = 1830.48$ ): C, 53.8; H, 5.29; N, 7.65. Found: C, 53.1; H, 5.33; N, 7.69.

### X-ray crystal structure determination

The data collection for **1** was carried out on a Bruker Apex II CCD diffractometer with graphite monochromated Mo- $K\alpha$  radiation ( $\lambda = 0.71073 \text{ \AA}$ ) at 273 K. The diffraction data were integrated by using the SAINT program, which were also used for the intensity corrections for the Lorentz and polarization effects. Absorption correction was applied using multi-scan program SADABS.<sup>2</sup> The structure was solved by direct methods. All atoms were refined anisotropically on  $F^2$  by full-matrix least squares using SHELXTL-97.<sup>3</sup> Non-hydrogen atoms were refined with anisotropic displacement parameters during the final cycles. All hydrogen atoms of organic molecules were placed by geometrical considerations and were added to the structure factor calculation. The remained solvent molecules (9 DMF and 43  $\text{H}_2\text{O}$  molecules) in the channels of **1** were disordered and could not be modeled properly, and the contribution of their electron density was removed by the SQUEEZE routine in PLATON, combining the results of thermogravimetric analysis. The formula for **1** was also determined by combining single-crystal structure, elemental microanalysis and TGA. A summary of the crystallographic data is listed in Table S1. Selected bond distances and angles are given in Table S2, respectively.

Table S1. Summary of Crystal Data and Structure Results for **1**.

|                    |                                                                               |
|--------------------|-------------------------------------------------------------------------------|
| Compound           | <b>1</b>                                                                      |
| chemical formula   | $\text{C}_{82}\text{H}_{96}\text{Co}_3\text{N}_{10}\text{O}_{27}$             |
| structural formula | $\text{Co}_3(\text{L})(\text{dib})\cdot 2\text{H}_2\text{O}\cdot 6\text{DMF}$ |
| fw                 | 1830.48                                                                       |
| Temperature (K)    | 273(2)                                                                        |
| $a$ (Å)            | 30.190(5)                                                                     |

|                                                                           |                                                                 |
|---------------------------------------------------------------------------|-----------------------------------------------------------------|
| <i>b</i> (Å)                                                              | 19.637(3)                                                       |
| <i>c</i> (Å)                                                              | 16.038(3)                                                       |
| $\alpha$ (°)                                                              | 90                                                              |
| $\beta$ (°)                                                               | 108.829(3)                                                      |
| $\gamma$ (°)                                                              | 90                                                              |
| <i>V</i> (Å <sup>3</sup> )                                                | 8999(3)                                                         |
| <i>Z</i>                                                                  | 4                                                               |
| space group                                                               | <i>C</i> 2/ <i>c</i>                                            |
| crystal system                                                            | monoclinic                                                      |
| 2 $\theta$ max (deg)                                                      | 52.28                                                           |
| $\mu$ (Mo-K $\alpha$ ) mm <sup>-1</sup>                                   | 0.627                                                           |
| <i>D</i> (g/cm <sup>3</sup> )                                             | 1.351                                                           |
| F(000)                                                                    | 3820                                                            |
| Reflections collected/unique                                              | 24499/8868 [ <i>R</i> <sub>int</sub> = 0.0921]                  |
| Final <i>R</i> indices [ <i>I</i> > 2 $\sigma$ ( <i>I</i> )] <sup>a</sup> | <i>R</i> <sub>1</sub> = 0.0896, <i>wR</i> <sub>2</sub> = 0.2453 |
| <i>R</i> indices (all data)                                               | <i>R</i> <sub>1</sub> = 0.1405, <i>wR</i> <sub>2</sub> = 0.2842 |
| GOF                                                                       | 0.959                                                           |
| Largest diff. peak and hole                                               | 2.108 and -0.632 e.Å <sup>-3</sup>                              |

$$^a R_1 = \sum ||F_o| - |F_c|| / \sum |F_o|, wR_2 = \{ \sum w[(F_o)^2 - (F_c)^2]^2 / \sum w[(F_o)^2]^2 \}^{1/2}.$$

Table S2. Selected bond lengths for **1**.

|              |          |               |          |
|--------------|----------|---------------|----------|
| Co(1)-O(9)#3 | 2.028(4) | Co(2)-O(10)#1 | 1.987(4) |
| Co(1)-O(9)#1 | 2.028(4) | Co(2)-N(1)    | 2.043(5) |
| Co(1)-O(4)#4 | 2.098(4) | Co(2)-O(3)    | 2.085(5) |
| Co(1)-O(4)   | 2.098(4) | Co(2)-O(7)#2  | 2.086(5) |
| Co(1)-O(7)#5 | 2.146(5) | Co(2)-O(4)    | 2.257(5) |
| Co(1)-O(7)#2 | 2.146(5) | Co(2)-O(6)#2  | 2.364(6) |
| O(1)-C(2)#3  | 1.429(7) | C(31)-C(32)#6 | 1.372(9) |
| O(6)-Co(2)#7 | 2.364(6) | O(7)-Co(1)#5  | 2.146(5) |
| O(7)-Co(2)#7 | 2.086(5) | O(9)-Co(1)#3  | 2.028(4) |

|                      |           |                      |            |
|----------------------|-----------|----------------------|------------|
| O(10)-Co(2)#8        | 1.987(4)  |                      |            |
| O(9)#3-Co(1)-O(9)#1  | 180       | O(4)-Co(1)-O(7)#5    | 98.41(19)  |
| O(9)#3-Co(1)-O(4)    | 89.79(16) | O(9)#1-Co(1)-O(7)#2  | 88.45(16)  |
| O(9)#1-Co(1)-O(4)    | 90.21(16) | O(4)-Co(1)-O(7)#2    | 81.59(19)  |
| O(4)#4-Co(1)-O(4)    | 180       | O(7)#5-Co(1)-O(7)#2  | 180        |
| O(9)#1-Co(1)-O(7)#5  | 91.55(16) | Co(2)#7-O(7)-Co(1)#5 | 97.0(2)    |
| C(2)#3-O(1)-C(2)     | 113.3(7)  | N(1)-Co(2)-O(6)#2    | 86.3(2)    |
| O(10)#1-Co(2)-N(1)   | 90.3(2)   | O(3)-Co(2)-O(6)#2    | 88.4(3)    |
| O(10)#1-Co(2)-O(3)   | 134.6(3)  | O(7)#2-Co(2)-O(6)#2  | 57.19(19)  |
| N(1)-Co(2)-O(3)      | 100.5(2)  | O(4)-Co(2)-O(6)#2    | 113.96(19) |
| O(10)#1-Co(2)-O(7)#2 | 95.45(19) | Co(1)-O(4)-Co(2)     | 93.40(17)  |
| N(1)-Co(2)-O(7)#2    | 130.9(2)  | O(3)-Co(2)-O(4)      | 59.91(17)  |
| O(3)-Co(2)-O(7)#2    | 109.0(2)  | O(7)#2-Co(2)-O(4)    | 79.27(17)  |
| O(10)#1-Co(2)-O(4)   | 89.39(18) | O(10)#1-Co(2)-O(6)#2 | 136.6(2)   |
| N(1)-Co(2)-O(4)      | 149.6(2)  |                      |            |

Symmetry transformations used to generate equivalent atoms:

#1  $x+1/2, -y+3/2, z-1/2$ ; #2  $x+1/2, -y+3/2, z+1/2$ ; #3  $-x+1, y, -z+3/2$ ; #4  $-x+3/2, -y+3/2, -z+1$ ; #5  $-x+1, y, -z+1/2$ ; #6  $-x+3/2, -y+1/2, -z+1$ ; #7  $x-1/2, -y+3/2, z-1/2$ ; #8  $x-1/2, -y+3/2, z+1/2$ .

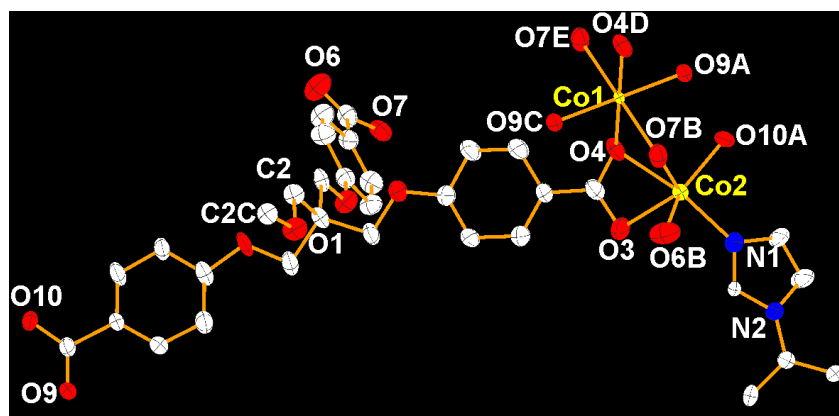

(a)

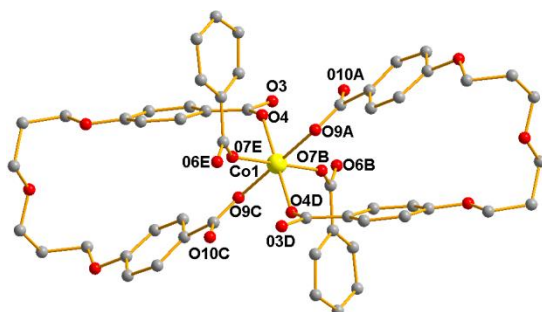

(b)

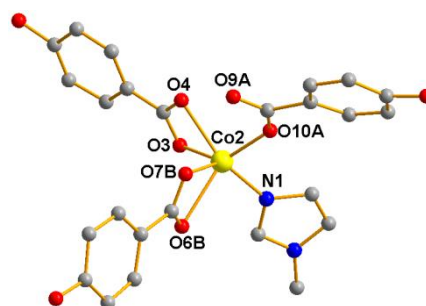

(c)

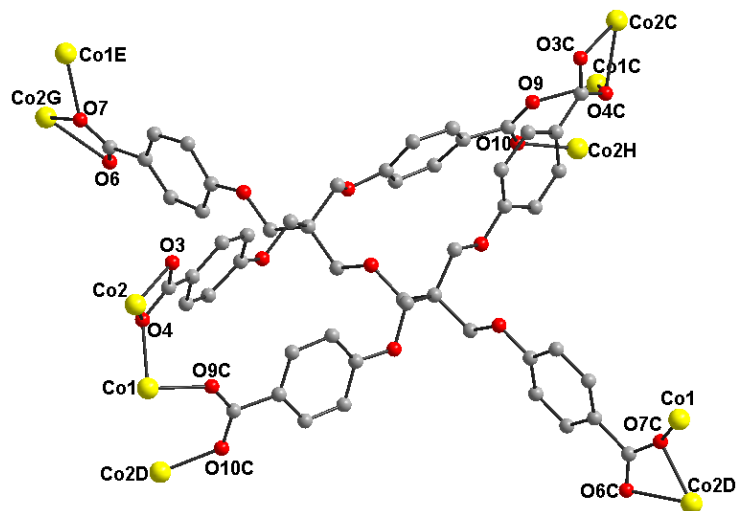

(d)

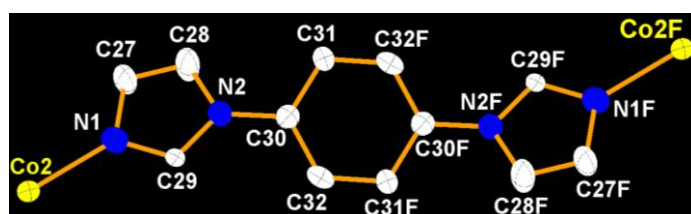

(e)

Fig. S1 The asymmetric unit of **1** (a), and coordination mode of Co(1) (b), Co(2) (c), H<sub>6</sub>L ligand (d) and dib ligand (e). Symmetry code: A  $x+1/2, -y+3/2, z-1/2$ ; B  $x+1/2, -y+3/2, z+1/2$ ; C  $-x+1, y, -z+3/2$ ; D  $-x+3/2, -y+3/2, -z+1$ ; E  $-x+1, y, -z+1/2$ ; F  $-x+3/2, -y+1/2, -z+1$ ; G  $x-1/2, -y+3/2, z-1/2$ ; H  $x-1/2, -y+3/2, z+1/2$ .

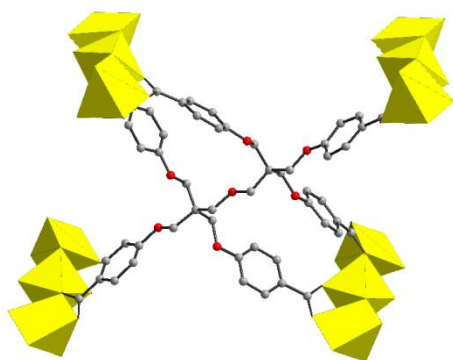

(a)

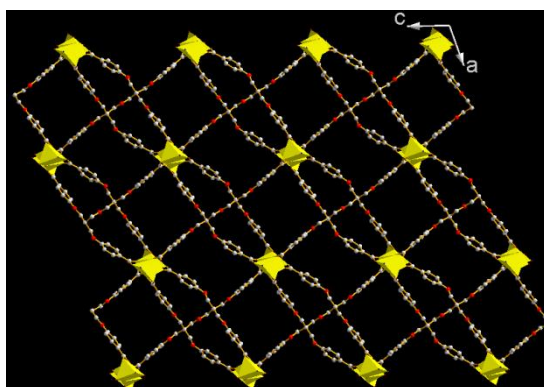

(b)

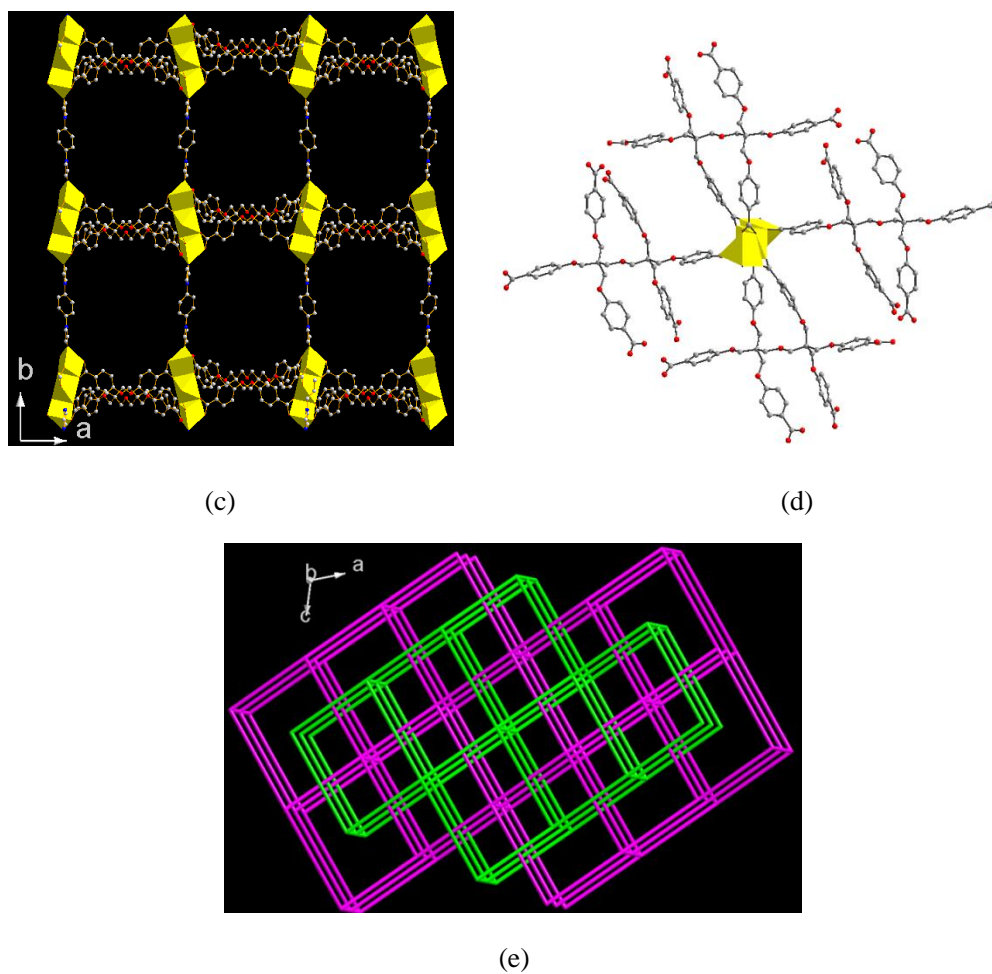

Fig. S2 (a and d) The connected node of L ligand (a) and  $\text{Co}^{\text{II}}_3$  SBU (d). (b) The 2D Co-L layer structure along [010] direction. (c) One independent 3D porous single net in **1**. (e) The simplified fsc net along [010] direction.

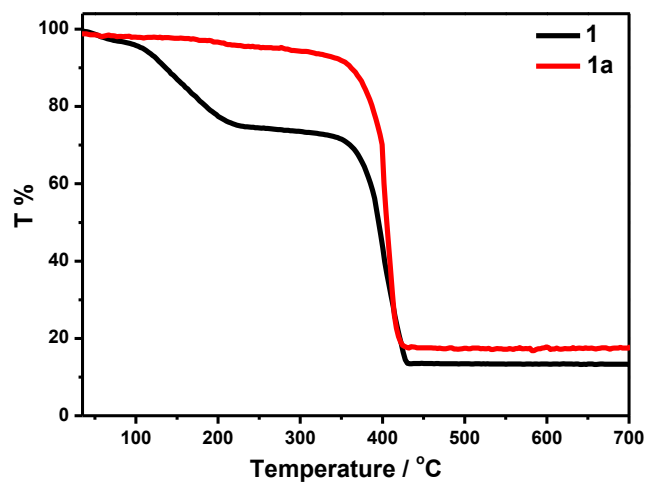

Fig. S3 The TGA curves of **1** and activated **1a**.

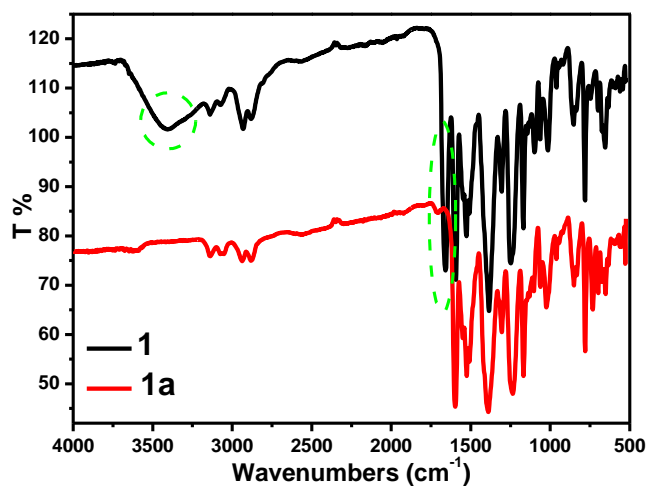

Fig. S4 The contrastive FT-IR spectra of **1** and activated **1a**.

**IR-1:** 3403 (m), 3142 (w), 3071 (w), 2935 (w), 2876 (w), 1659 (s), 1594 (s), 1530 (m), 1387 (vs), 1308 (m), 1243 (s), 1172 (m), 1100 (w), 1015 (m), 963 (w), 853 (m), 781 (m), 703 (w), 658 (m).

**IR-1a:** 3142 (w), 3058 (w), 2940 (w), 2882 (w), 1706 (w), 1600 (s), 1549 (w), 1523 (s), 1392 (vs), 1302 (m), 1236 (s), 1172 (m), 1068 (w), 1023 (m), 963 (w), 852 (m), 781 (m), 730 (w), 696 (w), 651 (w).

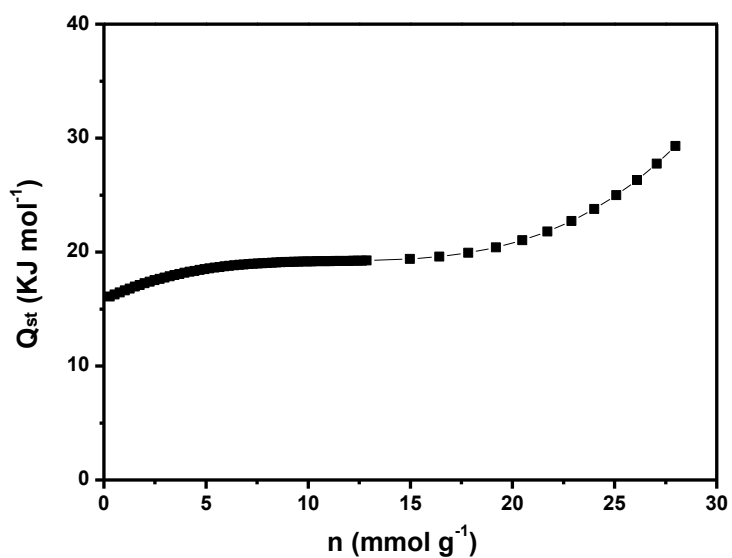

Fig. S5 Isosteric adsorption enthalpies of CO<sub>2</sub> on activated **1a**.

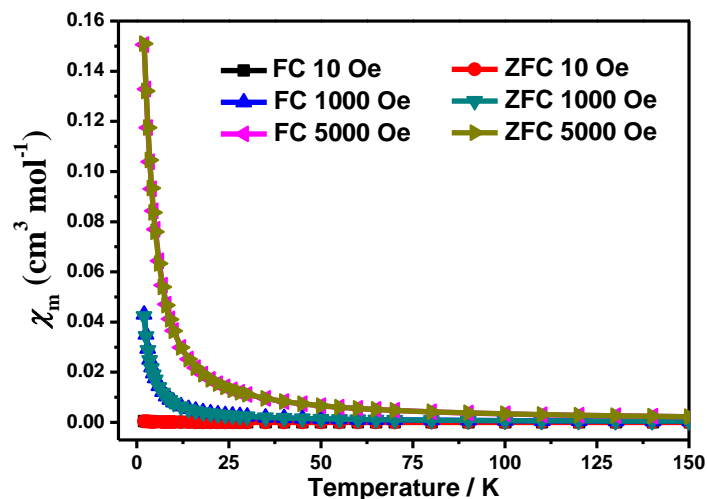

(a)

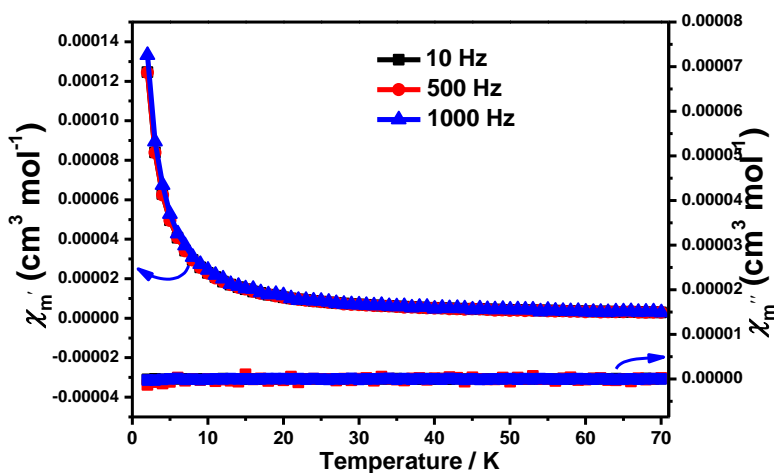

(b)

Fig. S6 The in-phase  $\chi_m'$  and out-of-phase  $\chi_m''$  components of the ac susceptibility of **1** measured at different frequencies (10, 500, 1000 Hz) in an applied ac field of 3 Oe; and ZFC & FC curves at  $H = 10, 1000$  and 5000 Oe from 2 to 150 K.

#### References:

- (1) (a) E. M. D. Keegstra, J. W. Zwikker, M. R. Roest and L. W. Jenneskens, *J. Org. Chem.*, 1992, **57**, 6678-6680; (b) D. Laliberte, T. Maris and J. D. Wuest, *J. Org. Chem.*, 2004, **69**, 1776-1787; (c) H.-Y. Wu, R.-X. Wang, W. Yang, J. Chen and Z.-M. Sun, J. Li, H. Zhang, *Inorg. Chem.*, 2012, **51**, 3103-3107.
- (2) G. M. Sheldrick, SADABS; University of Gottingen: Germany, 1996.
- (3) (a) G. M. Sheldrick, SHELXS-97, Program for X-ray Crystal Structure Determination; University of Gottingen: Germany, 1997; (b) G. M. Sheldrick, SHELXL-97, Program for



X-ray Crystal Structure Refinement; University of Gottingen: Germany, 1997; (c) CrystalClear, version 1.3.5; Rigaku Corp.: Woodlands, TX, 1999; (d) G. M. Sheldrick, SHELX-96: Program for Crystal Structure Determination; Siemens Analytical X-ray Instruments: Madison, WI, 1996.
